# Supplementary material
Source: publisher figshare collection journal article supplement (https://acs.figshare.com/ndownloader/files/5129041)
Supplement: Supplementary file 1 [file 5129041]

## Asymmetric Hydrogenation of isobutrophenone using a [(diphosphine)-RuCl<sub>2</sub>-(1,4-diamine) catalyst

Gabriela Grasa, Antonio Zanotti-Gerosa, Jonathan Medlock and William Hems

General procedure for preparation of [(*S*)-Binap RuCl<sub>2</sub> (*R*)-**1**]: A solution of (*S*)-Binap (0.1 mmol) and RuCl<sub>2</sub>(benzene) dimer (0.05 mmol) in DMF (1 ml) was heated at 100 °C for 15 mins. The DMF was removed and a solution of diamine **1** (0.1 mmol) in DCM was added and the mixture stirred at rt for 1hr. The solvent was removed in vacuo to give the catalyst as a golden brown solid which was used without further purification for the hydrogenation reactions. <sup>31</sup>P NMR (102 MHz, CDCl<sub>3</sub>)  $\delta$  44.57 (s). Crystal data: C<sub>51</sub>H<sub>48</sub>Cl<sub>2</sub>N<sub>2</sub>O<sub>2</sub>P<sub>2</sub>Ru, C<sub>4</sub>H<sub>10</sub>O, *M* = 1028.94, orthorhombic, *a* = 12.12220(10), *b* = 12.9432(2), *c* = 31.4025(4) Å, *U* = 4927.05(11) Å<sup>3</sup>, *T* = 180 K, space group *P*2<sub>1</sub>2<sub>1</sub>2<sub>1</sub>, *Z* = 4,  $\mu$ (Mo-K $\alpha$ ) = 0.538 mm<sup>-1</sup>, 8252 reflections measured, 7981 unique (*R*<sub>int</sub> = 0.0325) which were used in all calculations. The final *wR*(*F*<sup>2</sup>) was 0.0818 (all data).

The method was repeated using TolBinap and XylBinap ligands. The analyses of the resulting products were as follows;

(*R*)-TolBinap RuCl<sub>2</sub>(*R*)-**1**. <sup>31</sup>P NMR (102 MHz, CDCl<sub>3</sub>)  $\delta$  45.5 (s).

(*S*)-TolBinap RuCl<sub>2</sub> (*R*)-**1**. <sup>31</sup>P NMR (102 MHz, CDCl<sub>3</sub>)  $\delta$  44.8 (s).

(*R*)-XylBinap RuCl<sub>2</sub> (*R*)-**1**. <sup>31</sup>P NMR (102 MHz, CDCl<sub>3</sub>)  $\delta$  45.0 (s).

(*S*)-XylBinap RuCl<sub>2</sub> (*R*)-**1**. <sup>31</sup>P NMR (102 MHz, CDCl<sub>3</sub>)  $\delta$  45.2 (s).

General Procedure for Preparation of (*R/S*)-Xyl-P-Phos RuCl<sub>2</sub> (*R/S*)-**1** Catalysts.

Representative Example: A solution of (*S*)-Xyl-P-Phos (100 mg, 0.132 mmol) and [RuCl<sub>2</sub>(benzene)] dimer (31.5 mg, 0.063 mmol) in Dimethylformamide (1 ml) was heated at 100 °C for 2.5 hrs under N<sub>2</sub>. The dark red reaction mixture was cooled to room temperature. To this crude complex was added a solution of the (*R*)-**1** (0.138 mmol) in dichloromethane (1 ml) under nitrogen. The brown solution was stirred at room temperature overnight after which the solvent was removed in vacuo to yield the crude complex as a brown solid.

(*R*)-Xyl-P-Phos RuCl<sub>2</sub> (*R*)-**1**. <sup>31</sup>P NMR (102 MHz, CDCl<sub>3</sub>) δ43.7 (s).

(*S*)-Xyl-P-Phos RuCl<sub>2</sub> (*R*)-**1**. <sup>31</sup>P NMR (102 MHz, CDCl<sub>3</sub>) δ43.4 (s).

The method was repeated using (*R*)- and (*S*)-P-Phos. The analyses of the resulting products were as follows:

(*R*)-P-Phos RuCl<sub>2</sub> (*R*)-**1**. <sup>31</sup>P NMR (102 MHz, CDCl<sub>3</sub>) δ45.4 (s).

(*S*)-P-Phos RuCl<sub>2</sub> (*R*)-**1**. <sup>31</sup>P NMR (102 MHz, CDCl<sub>3</sub>) δ44.8 (s).

(*S*)-P-Phos RuCl<sub>2</sub> (*rac*)-**1**. <sup>31</sup>P NMR (102 MHz, CDCl<sub>3</sub>) δ44.8 and 45.5 (d).

### **Representative example of Hydrogenation using catalysts derived from Diamine**

#### **1**

Hydrogenation of isobutyrophenone at s/c 1000: To a 50 ml Parr autoclave was added (*S*)-P-Phos RuCl<sub>2</sub> (*rac*)-**1** (1.9 mg, 2 μmol). To this was added isobutyrophenone (2 mmol), tBuOK (1M in tBuOH, b/c 25) and 2-propanol (2 ml). The mixture was pressurised with H<sub>2</sub> (10 bar) and left until hydrogen consumption

had ceased (3 hrs). The pressure was released and a sample analysed by chiral GC (Chrompack Chirasil-DEX CB column).

### **Preparation of (*R/S*)-TolBINAP RuCl<sub>2</sub> (*S*)-2 Catalysts**

A solution of (*S*)-TolBinap (100 mg, 0.147 mmol) and [RuCl<sub>2</sub>(benzene)] dimer (37 mg, 0.0737 mmol) in DMF (1 ml) was heated at 110°C for 15 mins under N<sub>2</sub>. The dark red reaction mixture was cooled and the DMF removed in vacuo. To this crude complex was added a solution of the Diamine (*S*)-2 (34 mg, 0.147 mmol) in dichloromethane (5 ml) under nitrogen. The yellowish solution was stirred at room temperature for 1 hr after which the solvent was removed in vacuo. The complex was extracted from the crude solid by addition of hexane:MTBE (1:1, 10 ml), filtration and removal of the solvent which resulted in the precipitation of a yellow solid. The solvent was completely removed and to give the complex as a yellow solid.

(*S*)-Tol-BINAP RuCl<sub>2</sub> (*R*)-2: <sup>31</sup>P NMR (CDCl<sub>3</sub>, 102 MHz) δ 44.8

(*R*)-Tol-BINAP RuCl<sub>2</sub> (*R*)-2: <sup>31</sup>P NMR (CDCl<sub>3</sub>, 102 MHz) δ 45.4

### **Preparation of Catalysts using Diamine 3**

#### **Preparation of (*R/S*)-Xyl-P-Phos RuCl<sub>2</sub> (*S*)-3**

A solution of (*R*)- or (*S*)-Xyl-P-Phos (51 mg, 0.066 mmol) and [RuCl<sub>2</sub>(benzene)] dimer (16.8 mg, 0.0315 mmol) in Dimethylformamide (1 ml) was heated at 100°C for 2.5 hrs under nitrogen. The dark red reaction mixture was cooled to room temperature. To this crude complex was added a solution of the (*S*)-3 (0.067 mmol) in dichloromethane (1 ml) under nitrogen. The brown solution was stirred at room

temperature overnight after which the solvent was removed in vacuo to yield the crude complex as a brown solid.

(*R*)-Xyl-P-Phos RuCl<sub>2</sub> (*S*)-**3**: <sup>31</sup>P NMR (CDCl<sub>3</sub>, 102 MHz) δ 45.2 (d, J 37) and δ 41.3 (d, J 30)

(*S*)-Xyl-P-Phos RuCl<sub>2</sub> (*S*)-**3**: <sup>31</sup>P NMR (CDCl<sub>3</sub>, 102 MHz) δ 44.6 (d, J 37) and δ 41.7 (d, J 37)

### Further Examples of the Hydrogenation of Aromatic Ketones

**Table 1.** Hydrogenation of *o*-OMe-acetophenone using [(diphosphine) RuCl<sub>2</sub> (1,4 diamine)] catalysts

| Entry | Catalyst                                                         | Conv | ee              |
|-------|------------------------------------------------------------------|------|-----------------|
| 1     | ( <i>R</i> )-P-Phos RuCl <sub>2</sub> ( <i>R</i> )- <b>1</b>     | > 99 | 85 ( <i>R</i> ) |
| 2     | ( <i>S</i> )-P-Phos RuCl <sub>2</sub> ( <i>R</i> )- <b>1</b>     | > 99 | 93 ( <i>S</i> ) |
| 3     | ( <i>R</i> )-Xyl-P-Phos RuCl <sub>2</sub> ( <i>R</i> )- <b>1</b> | 18   | 23 ( <i>S</i> ) |
| 4     | ( <i>S</i> )-Xyl-P-Phos RuCl <sub>2</sub> ( <i>R</i> )- <b>1</b> | 76   | 32 ( <i>R</i> ) |
| 5     | ( <i>R</i> )-TolBinap RuCl <sub>2</sub> ( <i>R</i> )- <b>1</b>   | > 99 | 80 ( <i>R</i> ) |
| 6     | ( <i>S</i> )-TolBinap RuCl <sub>2</sub> ( <i>R</i> )- <b>1</b>   | > 99 | 92 ( <i>S</i> ) |
| 7     | ( <i>R</i> )-XylBinap RuCl <sub>2</sub> ( <i>R</i> )- <b>1</b>   | 21   | 14 ( <i>S</i> ) |
| 8     | ( <i>S</i> )-XylBinap RuCl <sub>2</sub> ( <i>R</i> )- <b>1</b>   | 35   | 33 ( <i>R</i> ) |

<sup>a</sup> The conversion and ee determined by chiral GC (Chrompack Chirasil DEX-CB column).

**Table 2.** Hydrogenation of cyclic ketones using [(*S*)Xyl-P-Phos RuCl<sub>2</sub> (*R*)-**1**] catalysts

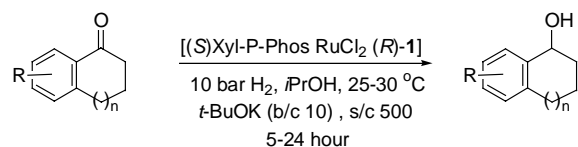

| Entry | n | R             | Conv. (%) | ee (%) |
|-------|---|---------------|-----------|--------|
| 1     | 0 | H             | > 99      | 82     |
| 2     | 1 | H             | > 99      | 96     |
| 3     | 1 | <i>m</i> -OMe | > 90      | 91     |
| 4     | 1 | <i>p</i> -OMe | > 99      | 98     |
| 5     | 2 | H             | > 99      | 69     |

<sup>a</sup> The conversion and ee determined by chiral GC (Chrompack Chirasil DEX-CB column).
